# Supplementary material for: Association of TP53 Single Nucleotide Polymorphisms with Prostate Cancer in a Racially Diverse Cohort of Men
Source: MDPI journal article supplement (doi:10.3390/biomedicines11051404), 2023-05-09
Supplement: s1 [file s1]

**Supplementary Table S1: Description of SNPs in *TP53* gene region with MAF of at least 1%**

| SNP         | Location   | Reference | Alternate | MAF (Minor Allele Frequency) |
|-------------|------------|-----------|-----------|------------------------------|
| rs144289006 | intergenic | ACCT      | A         | 0.05                         |
| rs78496430  | intergenic | A         | G         | 0.04                         |
| rs12600850  | intergenic | A         | G         | 0.56                         |
| rs62062581  | intergenic | T         | G         | 0.10                         |
| rs78337160  | intergenic | CT        | C         | 0.10                         |
| rs368098733 | intergenic | AAAAAG    | A         | 0.05                         |
| rs200145124 | intergenic | GTTTA     | G         | 0.03                         |
| rs9674772   | intergenic | A         | G         | 0.45                         |
| rs9674869   | intergenic | G         | A         | 0.03                         |
| rs150423780 | intergenic | T         | C         | 0.01                         |
| rs35119871  | intergenic | C         | T         | 0.17                         |
| rs147161837 | intergenic | C         | T         | 0.02                         |
| rs60706951  | intergenic | T         | C         | 0.11                         |
| rs72829457  | intergenic | C         | T         | 0.04                         |
| rs140032142 | intergenic | G         | A         | 0.01                         |
| rs55745760  | intergenic | C         | T         | 0.27                         |
| rs74351250  | intergenic | G         | A         | 0.02                         |
| rs144366923 | intergenic | C         | G         | 0.02                         |
| rs8073498   | intergenic | A         | C         | 0.42                         |
| rs17881045  | intergenic | C         | T         | 0.02                         |
| rs17881402  | intergenic | G         | A         | 0.11                         |
| rs17882212  | intergenic | G         | A         | 0.01                         |
| rs9893249   | intergenic | T         | C         | 0.42                         |
| rs17884512  | intergenic | A         | G         | 0.11                         |
| rs9914052   | downstream | G         | C         | 0.18                         |
| rs17881556  | downstream | T         | C         | 0.05                         |
| rs12949853  | downstream | G         | A         | 0.74                         |
| rs4968204   | downstream | C         | T         | 0.82                         |
| rs4968186   | downstream | A         | G         | 0.87                         |
| rs17883048  | downstream | G         | A         | 0.05                         |
| rs17886760  | downstream | T         | C         | 0.09                         |
| rs17887200  | downstream | T         | C         | 0.06                         |
| rs9894946   | downstream | A         | G         | 0.92                         |
| rs183153328 | downstream | C         | A         | 0.02                         |
| rs1614984   | downstream | G         | A         | 0.41                         |
| rs114831472 | UTR3       | G         | A         | 0.01                         |
| rs17884306  | UTR3       | C         | T         | 0.04                         |
| rs796594346 | UTR3       | AAC       | A         | 0.03                         |
| rs16956880  | UTR3       | C         | T         | 0.01                         |
| rs6503048   | intronic   | C         | T         | 0.27                         |
| rs59098034  | intronic   | C         | T         | 0.02                         |
| rs112847074 | intronic   | G         | A         | 0.01                         |
| rs17883852  | intronic   | G         | C         | 0.03                         |
| rs17879377  | intronic   | C         | T         | 0.03                         |
| rs1641549   | intronic   | C         | T         | 0.45                         |
| rs1641548   | intronic   | C         | T         | 0.11                         |
| rs9891744   | intronic   | C         | T         | 0.11                         |

|                  |               |          |          |             |
|------------------|---------------|----------|----------|-------------|
| rs858528         | intronic      | C        | T        | 0.25        |
| rs146137066      | intronic      | C        | T        | 0.01        |
| rs1642793        | intronic      | T        | C        | 0.76        |
| rs111537395      | intronic      | A        | T        | 0.01        |
| rs12949655       | intronic      | A        | G        | 0.10        |
| rs60699444       | intronic      | T        | A        | 0.20        |
| rs75732100       | intronic      | C        | T        | 0.11        |
| rs77697176       | intronic      | G        | A        | 0.02        |
| rs1800899        | intronic      | A        | G        | 0.02        |
| rs12951053       | intronic      | A        | C        | 0.10        |
| rs12947788       | intronic      | G        | A        | 0.10        |
| rs17880604       | intronic      | C        | G        | 0.01        |
| rs539331761      | intronic      | A        | AT       | 0.01        |
| rs8069054        | intronic      | C        | A        | 0.13        |
| rs1625895        | intronic      | T        | C        | 0.76        |
| rs2909430        | UTR5          | C        | T        | 0.77        |
| rs35850753       | UTR5          | C        | T        | 0.01        |
| rs9895829        | UTR5          | A        | G        | 0.10        |
| rs1794287        | intronic      | A        | G        | 0.78        |
| <b>rs1042522</b> | <b>exonic</b> | <b>G</b> | <b>C</b> | <b>0.50</b> |
| <b>rs1800371</b> | <b>exonic</b> | <b>G</b> | <b>A</b> | <b>0.01</b> |
| rs35117667       | intronic      | G        | A        | 0.02        |
| rs17883323       | intronic      | G        | T        | 0.10        |
| rs1642785        | UTR5          | G        | C        | 0.56        |
| rs8079544        | intronic      | C        | T        | 0.10        |
| rs9894227        | intronic      | G        | A        | 0.03        |
| rs12944939       | intronic      | C        | T        | 0.09        |

**Supplementary Table S2: Literature review table for Pro47Ser**

| Refs                                   | Association      | AA (allele) | Population       | Case/<br>Controls |
|----------------------------------------|------------------|-------------|------------------|-------------------|
| Gnanapradeepan, K.; <i>et al.</i> [55] | +                | Ser         | African/<br>mice |                   |
| Tutton, S.; <i>et al.</i> [56]         | +                | Ser         | African/<br>mice |                   |
| Pinto, G.R.; <i>et al.</i> [57]        | -                | Ser         | Brazil           | 94/100            |
| Murphy, M.E.; <i>et al.</i> [58]       | 1.72 (1.08-2.76) | Ser         | African          | 6907/<br>7644     |
| Almeida, L.O.; <i>et al.</i> [59]      | 1.28 (0.03-2.10) | Ser         |                  |                   |
| Barnoud, T.; <i>et al.</i> [13]        | +                | Ser         | African/<br>mice |                   |
| Jaiswal, P.K.; <i>et al.</i> [60]      | -                | Ser         | Indian           | 200/<br>200       |
| Siraj, A.K.; <i>et al.</i> [61]        | -                | Ser         | Saudi            | 223/<br>229       |

|                                     |   |     |           |             |
|-------------------------------------|---|-----|-----------|-------------|
| Daugherty, C.L.; <i>et al.</i> [62] | - | Ser | Caucasian | 191/<br>167 |
| Ruggeri, R.M.; <i>et al.</i> [63]   | - | Ser | Caucasian | 79/30       |

**Supplementary Table S3: Literature review table for Arg72Pro**

| References                          | Association                                                                                                                                                                                                 | AA (allele)                     | Population  | Case/<br>Controls |
|-------------------------------------|-------------------------------------------------------------------------------------------------------------------------------------------------------------------------------------------------------------|---------------------------------|-------------|-------------------|
| Elsaid, A.; <i>et al.</i> [64]      | +                                                                                                                                                                                                           | Pro                             | Egyptian    | 120/140           |
| Sameer, A.S.; <i>et al.</i> [65]    | +                                                                                                                                                                                                           | Pro                             | Kashmiri    | 86/160            |
| Pinto, G.R.; <i>et al.</i> [57]     | -                                                                                                                                                                                                           | Pro                             | Brazil      | 94/100            |
| Santos, L.E.; <i>et al.</i> [66]    | -                                                                                                                                                                                                           | Pro                             | Brazil      | 94/159            |
| Alawadi, S.; <i>et al.</i> [67]     | 0.166 (0.067-0.411) (decreased cancer risk)                                                                                                                                                                 | Pro/Pro                         | Arab        | 288/188           |
| Almeida, L.O.; <i>et al.</i> [59]   | 3.23 (1.71-6.08)                                                                                                                                                                                            | Pro                             |             |                   |
| Barnoud, T.; <i>et al.</i> [13]     | +                                                                                                                                                                                                           | Pro                             |             |                   |
| Mostaid, M.S.; <i>et al.</i> [68]   | 2.51 (1.38-4.82) and 4.62 (2.31-9.52)                                                                                                                                                                       | Arg/Pro and Pro/Pro             | Bangladesh  | 106/<br>116       |
| Siraj, A.K.; <i>et al.</i> [61]     | -                                                                                                                                                                                                           | Pro                             | Saudi       | 223/<br>229       |
| Daugherty, C.L.; <i>et al.</i> [62] | (1.16-2.82)                                                                                                                                                                                                 | Arg/Arg                         | Caucasian   | 191/167           |
| Ruggeri, R.M.; <i>et al.</i> [63]   | p = 0.039 and p = 0.042                                                                                                                                                                                     | Pro/Arg (G/C) and Arg/Arg (G/G) | Caucasian   | 79/30             |
| Nairuz, T.; <i>et al.</i> [69]      | -                                                                                                                                                                                                           |                                 | Bangladeshi | 180/200           |
| Diakite, B.; <i>et al.</i> [37]     | + : dominant model (DM)(1.09 (1.02-1.16));<br>additive model (AM)(1.09 (1.01-1.17))<br>- recessive model (RM)(1.07 (.97-1.18))<br>Pro: + association w/ CA for DM and AM; + association w/ AA for RM and AM | Pro                             | CA and AA   | 7841/<br>8876     |
| Fang, Y.; <i>et al.</i> [70]        | -                                                                                                                                                                                                           | Pro                             | Chinese     | 373/<br>762       |
| Drokow, E.K.; <i>et al.</i> [71]    | + : RM (1.276 (1.102-1.476));<br>DM (.891 (.802-.988))<br>+ : Chinese, American, African, Japanese, Indian pops                                                                                             | Pro                             | Muti-ethnic | 2337/<br>9494     |

**Supplementary Table S4: Allele frequency of rs1042522 and rs1800371 SNPs in TP53 gene region**

| Chr | Base Pair | rs ID     | Gene | Region | Ref Allele | Alt Allele | VAF    | VAF_AA | VAF_CA |
|-----|-----------|-----------|------|--------|------------|------------|--------|--------|--------|
| 17  | 7676154   | rs1042522 | TP53 | Exonic | G          | C          | 0.4951 | 0.4127 | 0.6789 |
| 17  | 7676230   | rs1800371 | TP53 | Exonic | G          | A          | 0.0097 | 0.0141 | 0      |

**Supplementary Table S5: Association of *TP53* SNPs with pathological upgrading from Diagnostic Biopsy to Radical Prostatectomy**

| Chrom | Location           | rsID        | Gene           | Variant Type | Wild Allele | Variant Allele |
|-------|--------------------|-------------|----------------|--------------|-------------|----------------|
| chr17 | chr17:7670065:C:T  | rs59098034  | TP53           | intronic     | C           | T              |
| chr17 | chr17:7673523:A:G  | rs1800899   | TP53           | intronic     | A           | G              |
| chr17 | chr17:7666224:G:A  | rs74351250  | ATP1B2\x3bTP53 | intergenic   | G           | A              |
| chr17 | chr17:7669404:C:T  | rs16956880  | TP53           | UTR3         | C           | T              |
| chr17 | chr17:7676230:G:A  | rs1800371   | TP53           | exonic       | G           | A              |
| chr17 | chr17:7664122:T:C  | rs150423780 | ATP1B2\x3bTP53 | intergenic   | T           | C              |
| chr17 | chr17:7666850:G:A  | rs17882212  | ATP1B2\x3bTP53 | intergenic   | G           | A              |
| chr17 | chr17:7671546:C:T  | rs9891744   | TP53           | intronic     | C           | T              |
| chr17 | chr17:7675353:C:T  | rs35850753  | TP53           | UTR5         | C           | T              |
| chr17 | chr17:7671461:C:T  | rs1641548   | TP53           | intronic     | C           | T              |
| chr17 | chr17:7673030:C:T  | rs75732100  | TP53           | intronic     | C           | T              |
| chr17 | chr17:7665607:C:T  | rs55745760  | ATP1B2\x3bTP53 | intergenic   | C           | T              |
| chr17 | chr17:7674797:T:C  | rs1625895   | TP53           | intronic     | T           | C              |
| chr17 | chr17:7671403:C:T  | rs17879377  | TP53           | intronic     | C           | T              |
| chr17 | chr17:7675361:A:G  | rs9895829   | TP53           | UTR5         | A           | G              |
| chr17 | chr17:7667762:A:G  | rs9894946   | TP53           | downstream   | A           | G              |
| chr17 | chr17:7674089:A:C  | rs12951053  | TP53           | intronic     | A           | C              |
| chr17 | chr17:7674109:G:A  | rs12947788  | TP53           | intronic     | G           | A              |
| chr17 | chr17:7672246:T:C  | rs1642793   | TP53           | intronic     | T           | C              |
| chr17 | chr17:7674525:A:AT | rs539331761 | TP53           | intronic     | A           | AT             |
| chr17 | chr17:7667612:A:G  | rs4968186   | TP53           | downstream   | A           | G              |
| chr17 | chr17:7673183:G:A  | rs77697176  | TP53           | intronic     | G           | A              |
| chr17 | chr17:7671457:C:T  | rs1641549   | TP53           | intronic     | C           | T              |
| chr17 | chr17:7671618:C:T  | rs858528    | TP53           | intronic     | C           | T              |
| chr17 | chr17:7676734:C:T  | rs8079544   | TP53           | intronic     | C           | T              |
| chr17 | chr17:7670066:G:A  | rs112847074 | TP53           | intronic     | G           | A              |
| chr17 | chr17:7664734:T:C  | rs60706951  | ATP1B2\x3bTP53 | intergenic   | T           | C              |
| chr17 | chr17:7666806:G:A  | rs17881402  | ATP1B2\x3bTP53 | intergenic   | G           | A              |
| chr17 | chr17:7666998:A:G  | rs1788451   | ATP1B2\x3bTP53 | intergenic   | A           | G              |

|       |                   |             |                |            |   |   |
|-------|-------------------|-------------|----------------|------------|---|---|
|       |                   | 2           | P53            |            |   |   |
| chr17 | chr17:7675327:C:T | rs2909430   | TP53           | UTR5       | C | T |
| chr17 | chr17:7676301:G:T | rs17883323  | TP53           | intronic   | G | T |
| chr17 | chr17:7667611:C:T | rs4968204   | TP53           | downstream | C | T |
| chr17 | chr17:7676483:G:C | rs1642785   | TP53           | UTR5       | G | C |
| chr17 | chr17:7676154:G:C | rs1042522   | TP53           | exonic     | G | C |
| chr17 | chr17:7672415:A:G | rs12949655  | TP53           | intronic   | A | G |
| chr17 | chr17:7677182:C:T | rs12944939  | TP53           | intronic   | C | T |
| chr17 | chr17:7672395:A:T | rs111537395 | TP53           | intronic   | A | T |
| chr17 | chr17:7662815:A:G | rs12600850  | ATP1B2\x3bTP53 | intergenic | A | G |
| chr17 | chr17:7669911:C:T | rs6503048   | TP53           | intronic   | C | T |
| chr17 | chr17:7666656:C:T | rs17881045  | ATP1B2\x3bTP53 | intergenic | C | T |
| chr17 | chr17:7665125:G:A | rs140032142 | ATP1B2\x3bTP53 | intergenic | G | A |

|       |                       |             |                |            |       |   |
|-------|-----------------------|-------------|----------------|------------|-------|---|
| chr17 | chr17:7662363:A:G     | rs78496430  | ATP1B2\x3bTP53 | intergenic | A     | G |
| chr17 | chr17:7663627:GTTTA:G | rs200145124 | ATP1B2\x3bTP53 | intergenic | GTTTA | G |
| chr17 | chr17:7676278:G:A     | rs35117667  | TP53           | intronic   | G     | A |
| chr17 | chr17:7668783:C:T     | rs17884306  | TP53           | UTR3       | C     | T |
| chr17 | chr17:7667660:T:C     | rs17886760  | TP53           | downstream | T     | C |
| chr17 | chr17:7675519:A:G     | rs1794287   | TP53           | intronic   | A     | G |
| chr17 | chr17:7665009:C:T     | rs72829457  | ATP1B2\x3bTP53 | intergenic | C     | T |
| chr17 | chr17:7662956:T:G     | rs62062581  | ATP1B2\x3bTP53 | intergenic | T     | G |
| chr17 | chr17:7663008:CT:C    | rs78337160  | ATP1B2\x3bTP53 | intergenic | CT    | C |
| chr17 | chr17:7667560:G:A     | rs12949853  | TP53           | downstream | G     | A |
| chr17 | chr17:7672958:T:A     | rs60699444  | TP53           | intronic   | T     | A |
| chr17 | chr17:7672196:C:T     | rs146137066 | TP53           | intronic   | C     | T |
| chr17 | chr17:7663783:G:A     | rs9674869   | ATP1B2\x3bTP53 | intergenic | G     | A |
| chr17 | chr17:7667505:G:C     | rs9914052   | TP53           | downstream | G     | C |
| chr17 | chr17:7666380:A:C     | rs8073498   | ATP1B2\x3bTP53 | intergenic | A     | C |
| chr17 | chr17:7666871:T:C     | rs9893249   | ATP1B2\x3bTP53 | intergenic | T     | C |
| chr17 | chr17:7668134:G:A     | rs1614984   | TP53           | downstream | G     | A |

|       |                        |             |                |            |        |   |
|-------|------------------------|-------------|----------------|------------|--------|---|
|       |                        |             |                | m          |        |   |
| chr17 | chr17:7663661:A:G      | rs9674772   | ATP1B2\x3bTP53 | intergenic | A      | G |
| chr17 | chr17:7676963:G:A      | rs9894227   | TP53           | intronic   | G      | A |
| chr17 | chr17:7666228:C:G      | rs144366923 | ATP1B2\x3bTP53 | intergenic | C      | G |
| chr17 | chr17:7667908:C:A      | rs183153328 | TP53           | downstream | C      | A |
| chr17 | chr17:7669038:AAC:A    | rs796594346 | TP53           | UTR3       | AAC    | A |
| chr17 | chr17:7661841:ACCT:A   | rs144289006 | ATP1B2\x3bTP53 | intergenic | ACCT   | A |
| chr17 | chr17:7663543:AAAAAG:A | rs368098733 | ATP1B2\x3bTP53 | intergenic | AAAAAG | A |
| chr17 | chr17:7664197:C:T      | rs35119871  | ATP1B2\x3bTP53 | intergenic | C      | T |
| chr17 | chr17:7674639:C:A      | rs8069054   | TP53           | intronic   | C      | A |
| chr17 | chr17:7667551:T:C      | rs17881556  | TP53           | downstream | T      | C |
| chr17 | chr17:7667638:G:A      | rs17883048  | TP53           | downstream | G      | A |
| chr17 | chr17:7674326:C:G      | rs17880604  | TP53           | intronic   | C      | G |
| chr17 | chr17:7668539:G:A      | rs114831472 | TP53           | UTR3       | G      | A |
| chr17 | chr17:7667753:T:C      | rs17887200  | TP53           | downstream | T      | C |
| chr17 | chr17:7664709:C:T      | rs147161837 | ATP1B2\x3bTP53 | intergenic | C      | T |
| chr17 | chr17:7670997:G:C      | rs17883852  | TP53           | intronic   | G      | C |
